# Supplementary material
Source: PubMed Central journal article supplement (PMC9939002)

**Supplementary Figure 1: The multivariate forest plot using all-cause mortality as the primary endpoint, with recipient diabetes status as the exposure variable 1**

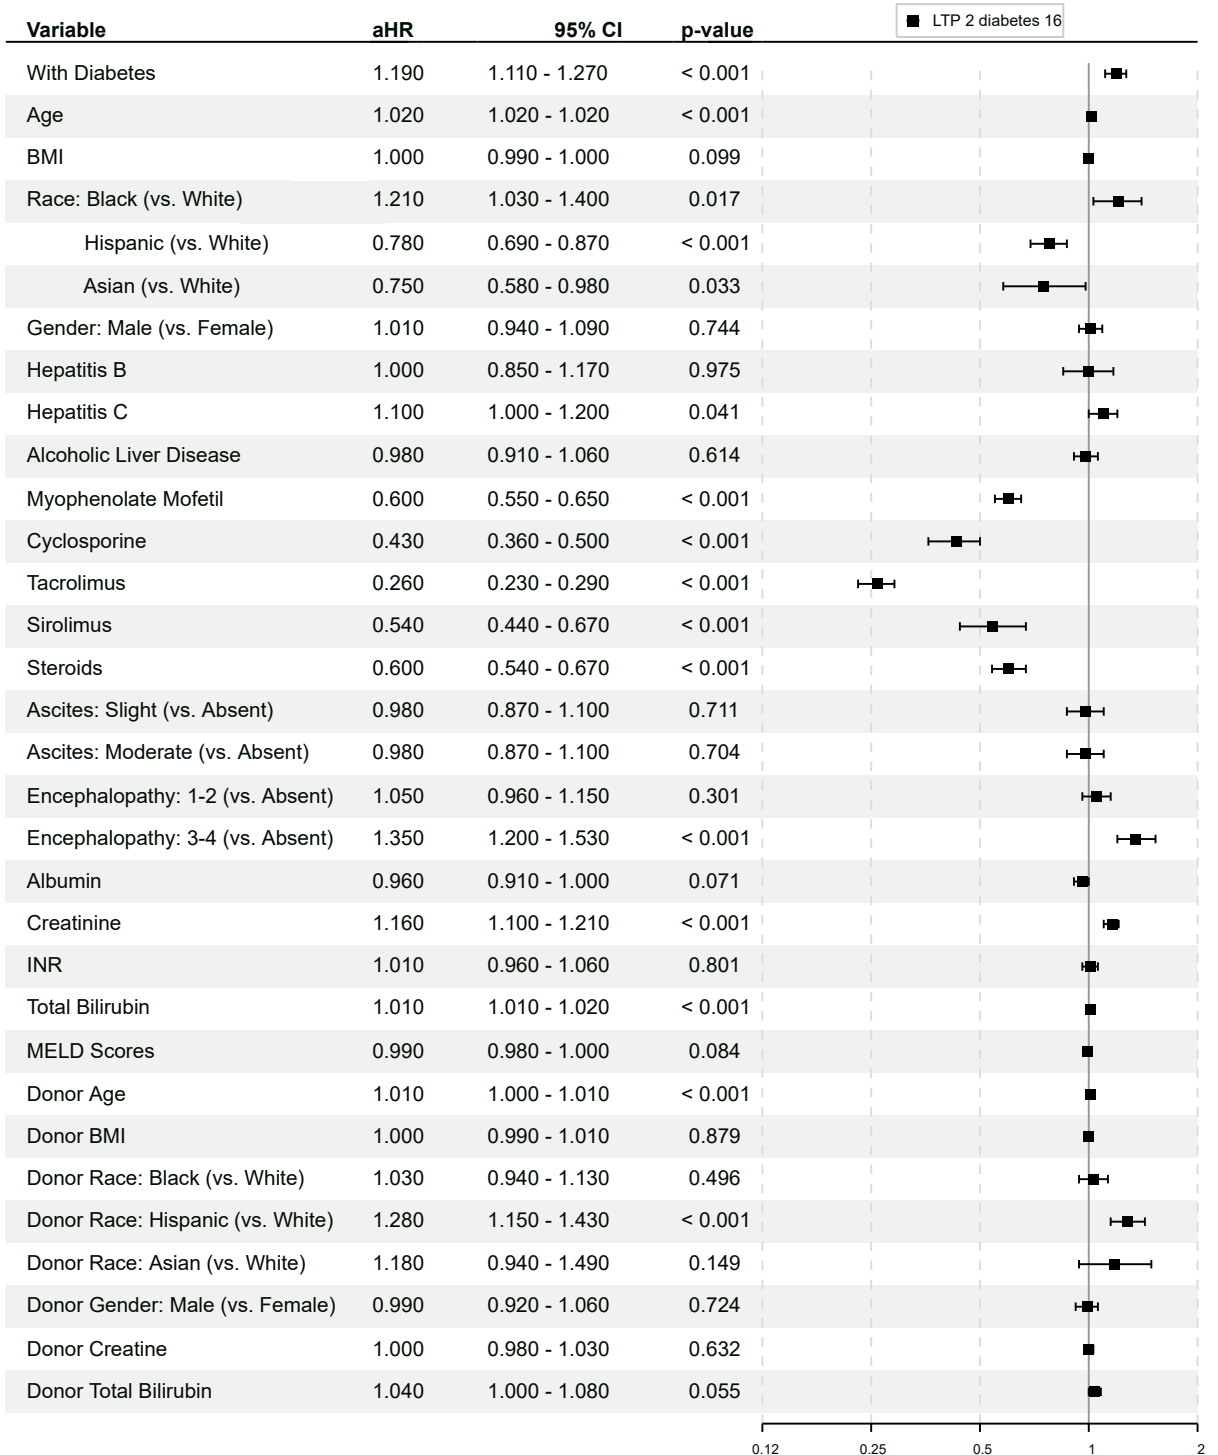

Supplement: NIHMS1870401-supplement-Supplementary_Figure_2.pdf [file NIHMS1870401-supplement-Supplementary_Figure_2.pdf]
